# Supplementary material
Source: PubMed Central journal article supplement (PMC8209552)
Supplement: bloodBLD2019004197-suppl1.pdf [file bloodBLD2019004197-suppl1.pdf]

A

| Patient Id | IGLV gene             | Clone size from analyzed reads | Total number of reads per sample |
|------------|-----------------------|--------------------------------|----------------------------------|
| p2         | IGLV1-44              | 96.67%                         | 228994                           |
| p4         | IGLV1-44              | 18.64%                         | 205251                           |
| p5         | IGLV1-44              | 79.77%                         | 301406                           |
| p7         | IGLV1-44              | 91.2%*                         | 228890                           |
| p8         | IGLV1-44              | 91.3%*                         | 206320                           |
| p9         | IGLV1-44 and IGLV3-1  | 3.4% and 27.78%                | 217839                           |
| p10        | IGLV1-44              | 43.62%                         | 17225                            |
| p11        | IGLV1-44              | 0.482%                         | 28875                            |
| p12        | IGLV1-44              | 4.591%                         | 67492                            |
| p13        | IGLV1-44              | 1.545%                         | 36847                            |
| p14        | IGLV1-44              | 41.95%                         | 43677                            |
| p15        | IGLV1-44              | 63.2%                          | 56035                            |
| p16        | IGLV1-44              | 49.77%                         | 57670                            |
| p17        | IGLV1-44              | 53.19%                         | 160762                           |
| p18        | IGLV1-44              | 84.89%*                        | 291384                           |
| p19        | IGLV1-40              | 54.98%                         | 185639                           |
| p20        | IGLV1-40              | 8.2%                           | 56931                            |
| p22        | IGLV1-40              | 45.7%                          | 238369                           |
| p23        | IGLV1-40              | 4.6%                           | 125686                           |
| p24        | IGLV1-40              | 71.93%                         | 33789                            |
| p25        | IGLV1-36              | 59.16%                         | 46422                            |
| p26        | IGLV1-36 and IGLV2-14 | 12.24% and 21.72%              | 107096                           |
| p27        | IGLV3-1               | 89.3%                          | 58365                            |
| p28        | IGLV3-1               | 96.08%                         | 558286                           |
| p29        | IGLV3-1               | 2.569%                         | 63266                            |
| p30        | IGLV3-25              | 6.6%                           | 168466                           |

B

### Vidjil analysis - p15 example

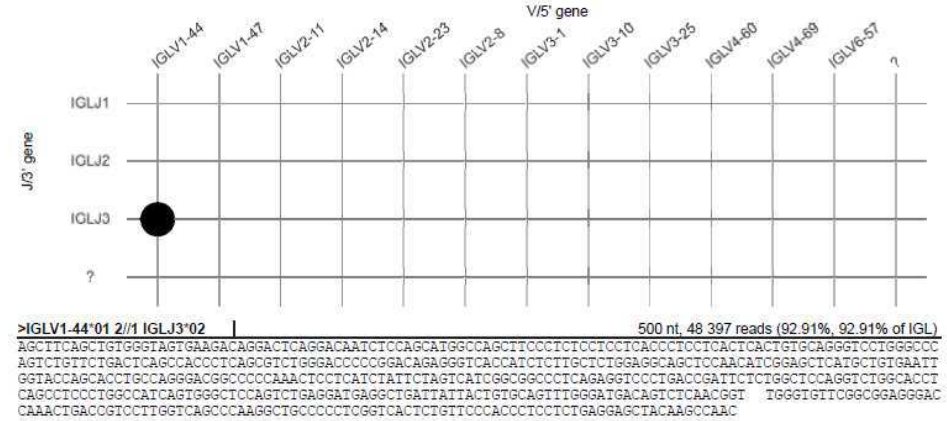

**Bone marrow lesion**

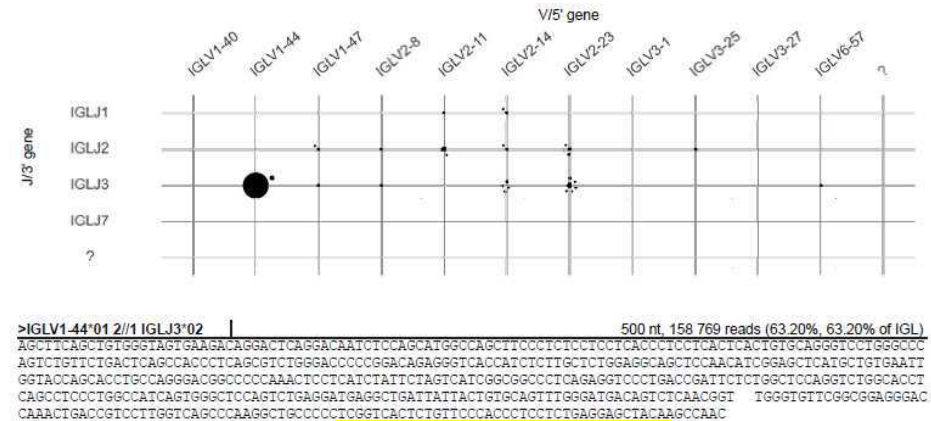

**Bone marrow aspirate**

Alignment

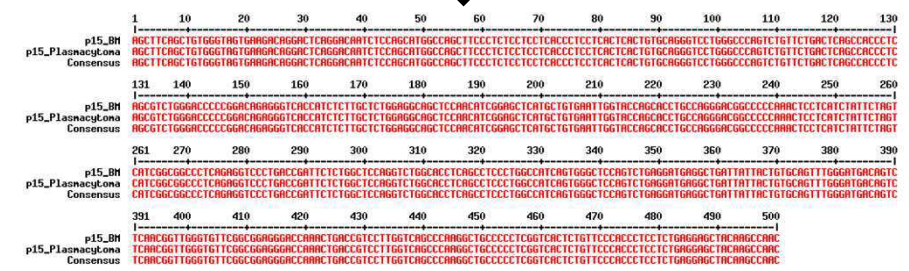

Supplemental Figure 1 : Analysis of the  $\lambda$  LC repertoire of patients with POEMS syndrome using Vidjil tool. (A) Percentage of the clonal  $\lambda$  LC sequences in the  $\lambda$  repertoire obtained with RACE-RepSeq and using Vidjil tool for analysis ([www.vidjil.org](http://www.vidjil.org)). All sequences were obtained from bone marrow aspirates except for \* corresponding to bone marrow lesion biopsies. (B) Example of Vidjil tool analysis for patient 15 (p15). Clonal sequences from bone marrow aspirate and lesion are identical using multalin alignment tool (<http://multalin.toulouse.inra.fr/multalin/>).

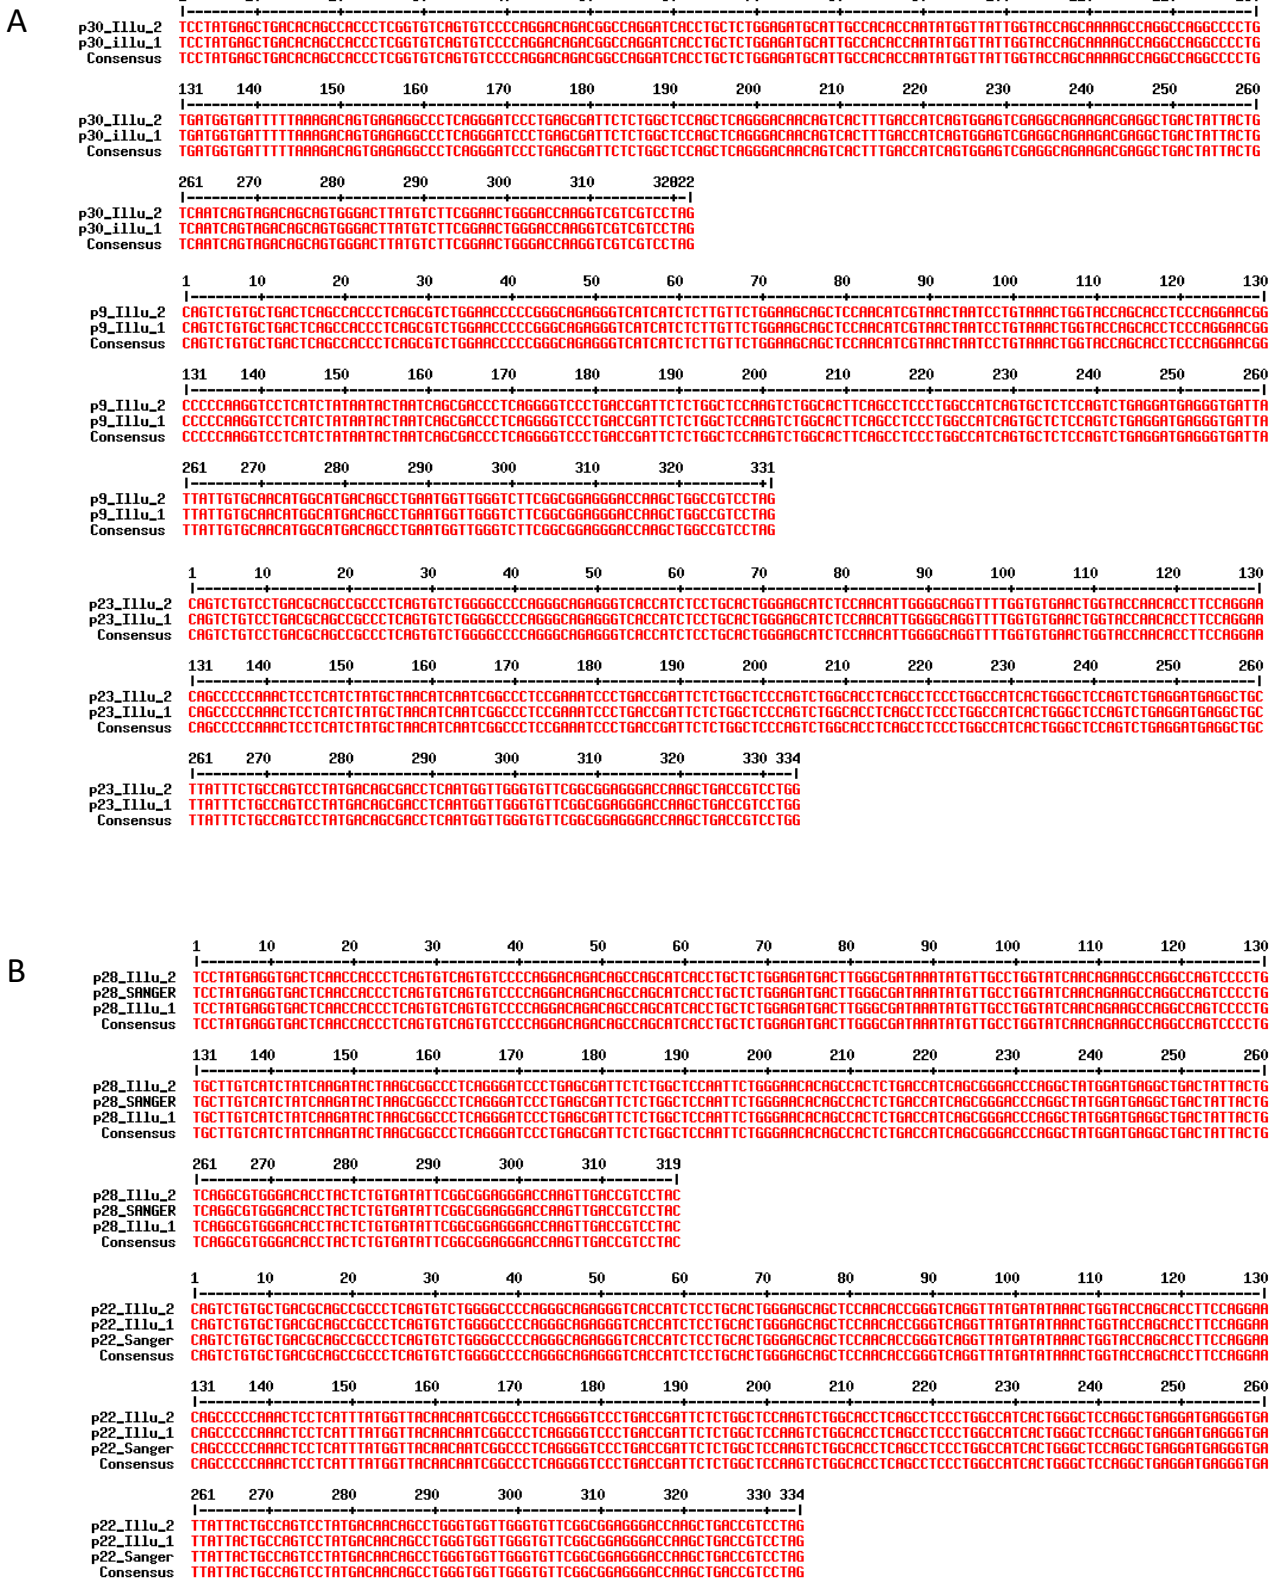

Supplemental Figure 2 : (A) Clonal VJ domain sequences obtained for three patients (p23, p9, p30) by Illumina sequencing in two independent experiments and (B) clonal VJ domain sequences obtained for two other patients (p28, p22) by Illumina sequencing in two independent experiments compared to Sanger sequencing, using multalin alignment tool (<http://multalin.toulouse.inra.fr/multalin/>).



```

Com4      QSVLTQPPS-ASGTPGQRVSIISCSGS TSNI----GSNT VNWYLHLPGTAPKLLIY SN-----N QRPFGVP-DRFSGSK--SGTSASLAISGLQSEDEADYYC AAWDDSLDG
Com6      QSVLTQPPS-ASGTPGQRVTIISCSGS SSNI----GRNT VHWYQQLPGTAPKFLIF NT-----Y DRPSGVA-DRFAGSK--SDTSASLAISGLQSDDEADYYC ATWDDNLNE
AL1       QSVLTQPPS-ASGTPGQRVTIISCSGG TSNI----GDNS VHWYQQLPGTAPKLLIY SN-----D QRPFGVA-DRFSGSK--SGTSASLAISALQSEDEADYYC SSWDDSLHG
AL2       QSVLTQPPS-ASGTPGQRVTIISCSGS SSNI----ASNS VHWYQHLPGTAPKLLIY SN-----N QRPFGVP-DRFSGSK--SGTSASLAISGLQSEDEADYYC GWDDSVTG
IGLV1-44  QSVLTQPPS-ASGTPGQRVTIISCSGS SSNI----GSNT VNWYQQLPGTAPKLLIY SN-----N QRPFGVP-DRFSGSK--SGTSASLAISGLQSEDEADYYC AAWDDSLNG

```

|          | FR1                         | CDR1         | FR2                | CDR2     | FR3                                     | CDR3      |
|----------|-----------------------------|--------------|--------------------|----------|-----------------------------------------|-----------|
| AF462673 | QSVLTHPPS-VSGAPGQRVTIISCTGS | RSNIG---SGYE | IHWYQQLPGEAPQLLIY  | GD-----T | NRPSGVP-DRFSGSK--SGTSASLAITGLQAEDEADYHC | QSYDISRSG |
| AF320834 | QSVLTQPPS-VSGAPGQWVTIISCTGS | RSNIG---AGFD | VHWYQQLPGSAPKLLIY  | AN-----I | YRPSGVP-DRFSGSK--SGTSASLAITGLQPEDEANYC  | QSYDNNPNT |
| EF589558 | QSVLTQPPS-VSGAPGQRVTIISCTGS | SSNIG---AGYY | VHWYQQLPGTAPKLLIY  | GN-----I | NRPSGVT-DRFSGSK--SGTSASLAITGLQAEDEADYYC | HSYDNLISA |
| EF589450 | QSVLTQPPS-VSGAPGQRVTIISCTGS | SSNIG---AGYD | VHWYQQLPGTAPKLLIY  | AN-----N | NRPSGVP-DRFSASK--SGTSASLAITGLQAEDEADYFC | QSYDSSLGG |
| EU599322 | QSVLTQPPS-VSGAPGQRVTIISCTGS | RSNIG---AGYH | VHWYQQLPGTAPKLLIY  | AD-----T | NRPSGVP-DRFSGSK--SGTSASLAITGLQAEDEAEYIC | QSYDTNLV- |
| EF589512 | QSVLTQPPS-VSGAPGQRVTIISCTGS | TSNIG---ARYD | VHWYQQLPGAAPKLLIY  | GN-----T | NRPSGVP-DRFSGSK--SGTSASLAITGLQAEDEADYYC | QSYDNLISG |
| EF589542 | QSVLTQPPS-VSGAPGQWVTIISCTGS | NSNIG---TGYD | LHWYQQLPGTAPKLLIY  | GN-----T | NRPSGVP-DRFSGSK--SGTSASLAITGLQAEDEADYYC | QTYDSSVSA |
| AF320844 | QSVLTQPPS-VSGAPGQRVTIISCTGS | SSNIG---AGID | VHWYQQLPGTAPKLLIY  | DN-----I | NRPSGVP-DRFSGSK--SATSASLAITGLQADDEADYYC | QSYDSSLG  |
| AF490938 | -----XPX-VSGAPGQRVTIISCTGS  | SSNLG---AGYD | VHWYQQLPGTAPKVIYIY | GN-----N | IRPSGVP-DRISGSK--SGTSASLAITGLQAEDEADYYC | QSYDRSG-- |
| EF589403 | QSVLTQPPS-VSGAPGQRVTIISCTGS | SSNIG---AGYE | VHWYQQLPGTAPKLLMY  | GN-----T | NRPSGVP-DRFSGSK--SGSSASLAITGLQAEDESYYC  | QSYDSSMSG |
| EF589431 | QSVLTQPPS-VSGAPGQRVTIISCTGS | SSNIG---ARYD | VHWYQHLPGTAPKLLIY  | AN-----N | NRPSGVP-DRFSGSK--SGTSASLAITGLQAEDEALYYC | QSYDSSLSD |
| F01703   | QSVLTQPPS-VSGAPGQRVTIISCTGS | SSNIG---AGNH | VHWYQQLPGTAPKLLIF  | HN-----N | -----ARFSVSK--SGSSATLAITGLQAEDEADYYC    | -----     |
| DQ098786 | QSVLTQPPS-VSGAPGQRVTIISCTGS | SSNIG---AGYD | VHWYQQLPGTAPKLLIY  | GN-----K | NRPSGVP-DRFSASK--SGTSASLAITGLQADDEADYYC | QSYDSSLR- |
| DQ098812 | ----TQPPS-VSGAPGQRVTIISCTGS | RSNIG---AGYD | VHWYQQLPGTAPKLLIY  | GN-----T | NRPSGVP-NRFSGAK--SGTSASLAITGLQAEDEGDYYC | QSYDNLISG |
| DQ098814 | QSVLTQPPS-VSGAPGQRVTIISCTGN | KSNIG---AGYD | VHWYQLIPGTAPKLLIY  | GN-----V | NRLSGVP-DRFSGSK--SGTSASLAITGLQAEDEADYYC | QSYDTSVNG |
| AY180392 | -----QRVTIISCTGS            | SSNIV---EGHD | VHWYQQLPGKAPKLLIY  | GN-----N | NRPSGVP-DRFSGSK--SGTSASLAITGLQAEDEADYYC | QSYDSSLSF |
| AL3      | QSVLTQPPS-VSGAPGQRVTIISCTGS | SSNIG---AGYD | VHWYQQLIPGTAPKLLIY | LN-----T | NRPSGVP-DRFSGSK--SDTSASLAITGLQAEDEADYYC | QSYDNLISG |
| AL4      | QSVLTQPPS-VSGAPDQRVTIISCTGT | SSNIG---AHYD | VHWYQHLPGTAPKLLIY  | GN-----N | NRPSGVP-DRFSGSK--SDISASLAITGLQAEDEGDYFC | QSYDRLSG  |
| IGLV1-40 | QSVLTQPPS-VSGAPGQRVTIISCTGS | SSNIG---AGYD | VHWYQQLPGTAPKLLIY  | GN-----S | NRPSGVP-DRFSGSK--SGTSASLAITGLQAEDEADYYC | QSYDSSLG  |

Supplemental Figure 3: Deduced amino-acid sequences of monoclonal IGLV1-44 and IGLV1-40 ð light chain variable domains of AL amyloidosis or other plasma cell disorders patients compared to germline sequences according to IMGT numbering. Per1 to Per14 from Perfetti et al26, com2 to com6 from Comenzo et al27, AL1 to AL4 personal data, all other sequences from the Boston university AL-Base database28. A and P mutations in position 38 for IGHV1-44 and N in position 40 for IGHV1-40 are in red underlined.
